# Supplementary material for: Two-peak approximation in kinetic capillary electrophoresis
Source: Royal Society of Chemistry journal article supplement (doi:10.1039/c2an16218k), 2012-01-01
Supplement: c2an16218k.pdf [file c2an16218k.pdf]

## SUPPLEMENTARY INFORMATION

### Two-peak approximation in kinetic capillary electrophoresis

Leonid T. Cherney and Sergey N. Krylov

*Department of Chemistry and Centre for Research on Biomolecular Interactions, York University, Toronto, Ontario, M3J 1P3, Canada*

#### 1. Derivation of ordinary differential equations for mass transfer in zones A\* and C\*

Mass transfer of A\* and C\* is described by the following equations:

$$\begin{aligned}(\partial_t + v_A \partial_x)A^* &= -k_+ A^* B + k_- C^* \\(\partial_t + v_C \partial_x)C^* &= k_+ A^* B - k_- C^*\end{aligned}\tag{S1}$$

where  $\partial_x$  and  $\partial_t$  are partial derivations by the spatial coordinate  $x$  and time  $t$ , respectively;  $A^*$  and  $C^*$  are linear concentrations of A\* and C\*, respectively (i.e. amounts of A\* and C\* per unit length of the reactor);  $B = \text{const}$  is a volume concentration of B; and  $v_A$  and  $v_C$  are the velocities of A\* and C\*;  $k_+$  and  $k_-$  are the rate constants of the forward and reversed processes in the following equilibrium:

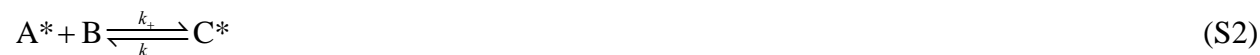

Let us consider propagation patterns in a case of slow ( $t_{\text{eq}} \gg t_{\text{sep}}$ ) or moderate-rate ( $t_{\text{eq}} \sim t_{\text{sep}}$ ) equilibration. In this case, the two peaks, A\* and C\*, can be identified at the flanks of the label distribution (or the distribution of mixture of A\* and C\*). They move with velocities  $v_A$  and  $v_C$ , respectively (**Fig. S1**). As a result, the following transformations hold in zone A\*:

$$\begin{aligned}\frac{d}{dt} \int_{x_a^-}^{x_a^+} A^* dx &= \int_{x_a^-}^{x_a^+} \frac{\partial A^*}{\partial t} dx + A^*(x_a^+) \frac{dx_a^+}{dt} - A^*(x_a^-) \frac{dx_a^-}{dt} = \\&= - \int_{x_a^-}^{x_a^+} \left( v_A \frac{\partial A^*}{\partial x} + k_+ B A^* - k_- C^* \right) dx + v_A \left[ A^*(x_a^+) - A^*(x_a^-) \right] = \\&= -k_+ B \int_{x_a^-}^{x_a^+} A^* dx + k_- \int_{x_a^-}^{x_a^+} C^* dx\end{aligned}\tag{S3}$$

and

$$\begin{aligned} \frac{d}{dt} \int_{x_a^-}^{x_a^+} C^* dx &= \int_{x_a^-}^{x_a^+} \frac{\partial C^*}{\partial t} dx + C^*(x_a^+) \frac{dx_a^+}{dt} - C^*(x_a^-) \frac{dx_a^-}{dt} = \\ &= - \int_{x_a^-}^{x_a^+} \left( v_c \frac{\partial C^*}{\partial x} - k_+ B A^* + k_- C^* \right) dx + v_A [C^*(x_a^+) - C^*(x_a^-)] = \\ &= k_+ B \int_{x_a^-}^{x_a^+} A^* dx - k_- \int_{x_a^-}^{x_a^+} C^* dx - (v_c - v_A) C^*(x_a^+) \end{aligned} \quad (\text{S4})$$

Here,  $x_a^-(t)$  and  $x_a^+(t)$  are coordinates of the boundaries of zone A\* (**Fig. S1**). To derive transformations (S3) and (S4), we used equations (S1) and the four following relations:

$$\int_{x_a^-}^{x_a^+} \frac{\partial A^*}{\partial x} dx = A^*(x_a^+) - A^*(x_a^-), \quad \int_{x_a^-}^{x_a^+} \frac{\partial C^*}{\partial x} dx = C^*(x_a^+) - C^*(x_a^-), \quad \frac{dx_a^\pm}{dt} = v_A, \quad C^*(x_a^-) = 0 \quad (\text{S5})$$

The last equation in (S5) follows from the fact that the concentration  $C^*$  vanishes at the left boundary of zone A\*.

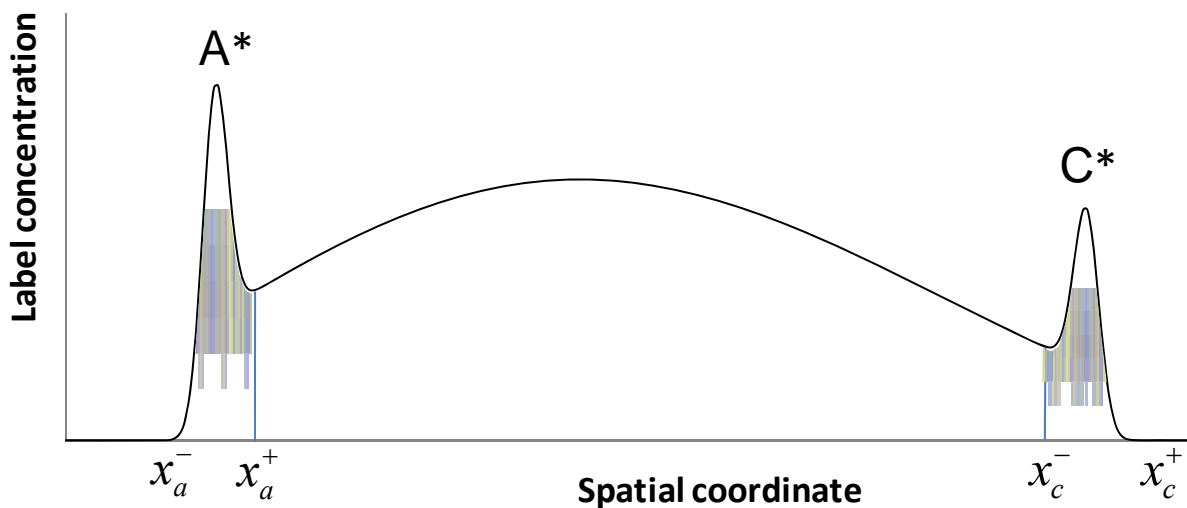

**Figure S1.** Spatial propagation pattern of the mixture of A\* and C\*. Their sum concentration coincides with that of the label. Areas corresponding to zones A\* and C\* are shaded. At  $v_c > v_A$ , zone C\* is located to the right of zone A\* (both zones move from left to right). Coordinates of the boundaries of zone A\* are denoted by  $x_a^-$  and  $x_a^+$ , whereas coordinates of the boundaries of zone C\* are denoted by  $x_c^-$  and  $x_c^+$ . At  $k_- > Bk_+$ , peak C\* is lower than peak A\*.

Transformations similar to (S3) and (S4) hold in zone C\*:

$$\begin{aligned} \frac{d}{dt} \int_{x_c^-}^{x_c^+} A^* dx &= \int_{x_c^-}^{x_c^+} \frac{\partial A^*}{\partial t} dx + A^*(x_c^+) \frac{dx_c^+}{dt} - A^*(x_c^-) \frac{dx_c^-}{dt} = \\ & - \int_{x_c^-}^{x_c^+} \left( v_A \frac{\partial A^*}{\partial x} + k_+ B A^* - k_- C^* \right) dx + v_C \left[ A^*(x_c^+) - A^*(x_c^-) \right] = \\ & - k_+ B \int_{x_c^-}^{x_c^+} A^* dx + k_- \int_{x_c^-}^{x_c^+} C^* dx - (v_C - v_A) A^*(x_c^-) \end{aligned} \quad (\text{S6})$$

and

$$\begin{aligned} \frac{d}{dt} \int_{x_c^-}^{x_c^+} C^* dx &= \int_{x_c^-}^{x_c^+} \frac{\partial C^*}{\partial t} dx + C^*(x_c^+) \frac{dx_c^+}{dt} - C^*(x_c^-) \frac{dx_c^-}{dt} = \\ & - \int_{x_c^-}^{x_c^+} \left( v_C \frac{\partial C^*}{\partial x} - k_+ B A^* + k_- C^* \right) dx + v_C \left[ C^*(x_c^+) - C^*(x_c^-) \right] = \\ & k_+ B \int_{x_c^-}^{x_c^+} A^* dx - k_- \int_{x_c^-}^{x_c^+} C^* dx \end{aligned} \quad (\text{S7})$$

Here,  $x_c^-(t)$  and  $x_c^+(t)$  are coordinates of the left and right boundaries of zone C\* (**Fig. S1**). To derive transformations (S4) and (S7), we again used equations (S1) and the following relations:

$$\int_{x_c^-}^{x_c^+} \frac{\partial A^*}{\partial x} dx = A^*(x_c^+) - A^*(x_c^-), \quad \int_{x_c^-}^{x_c^+} \frac{\partial C^*}{\partial x} dx = C^*(x_c^+) - C^*(x_c^-), \quad \frac{dx_c^\pm}{dt} = v_C, \quad A^*(x_c^+) = 0 \quad (\text{S8})$$

The last equation in (S8) follows from the fact that the concentration  $A^*$  approaches zero at the right boundary of zone C\*.

Propagation patterns simulated with the exact solution of equations (S1) demonstrate the following behavior after introducing the initial plug containing compounds  $A^*$  and  $C^*$ . During time  $\sim t_{\text{sep}}$ , the peak corresponding to compound  $C^*$  moves out of zone  $A^*$  and the peak corresponding to compound  $A^*$  moves out of zone  $C^*$ . As a result, the distribution of  $C^*$  in zone  $A^*$  and the distribution of  $A^*$  in zone  $C^*$  become monotonic and can be approximated using power series:

$$C^*(x) = c_0 + c_1(x - x_a^-) + c_2(x - x_a^-)^2 + \dots \quad (x_a^- \leq x \leq x_a^+) \quad (\text{S9})$$

$$A^*(x) = a_0 + a_1(x - x_c^+) + a_2(x - x_c^+)^2 + \dots \quad (x_c^- \leq x \leq x_c^+) \quad (\text{S10})$$

Since  $C^*(x)$  and  $A^*(x)$  are smooth functions that vanish at  $x_a^-$  and  $x_c^+$ , respectively, we have:

$$c_0 = 0, \quad c_1 = 0, \quad a_0 = 0, \quad a_1 = 0. \quad (\text{S11})$$

Therefore:

$$\int_{x_a^-}^{x_a^+} C^* dx = \frac{c_2}{3} (x_a^+ - x_a^-)^3 + \dots, \quad \int_{x_c^-}^{x_c^+} A^* dx = \frac{a_2}{3} (x_c^+ - x_c^-)^3 + \dots \quad (\text{S12})$$

By comparing expansions (S9) and (S10) to (S12) and taking into account only the leading terms in them, we obtain the following approximate relations:

$$C^*(x_a^+) \approx \frac{3}{x_a^+ - x_a^-} \int_{x_a^-}^{x_a^+} C^* dx, \quad A^*(x_c^-) \approx \frac{3}{x_c^+ - x_c^-} \int_{x_c^-}^{x_c^+} A^* dx \quad (\text{S13})$$

Given expressions (S13), relations (S3), (S4), (S6), and (S7) can be rewritten in the form:

$$\frac{dA_a^*}{dt} = -k_+ BA_a^* + k_- C_a^*, \quad \frac{dC_a^*}{dt} = k_+ BA_a^* - \left( k_- + \frac{3(v_C - v_A)}{W_a} \right) C_a^* \quad (\text{S14})$$

$$\frac{dA_c^*}{dt} = - \left( k_+ B + \frac{3(v_C - v_A)}{W_c} \right) A_c^* + k_- C_c^*, \quad \frac{dC_c^*}{dt} = k_+ BA_c^* - k_- C_c^* \quad (\text{S15})$$

Here,  $A_a^*$  and  $C_a^*$  are the total amounts of A\* and C\* in the zone of A\*:

$$A_a^* = \int_{x_a^-}^{x_a^+} A^* dx, \quad C_a^* = \int_{x_a^-}^{x_a^+} C^* dx; \quad (\text{S16})$$

$A_c^*$  and  $C_c^*$  are the total amounts of A\* and C\* in the zone of C\*:

$$A_c^* = \int_{x_c^-}^{x_c^+} A^* dx, \quad C_c^* = \int_{x_c^-}^{x_c^+} C^* dx; \quad (\text{S17})$$

$W_a$  and  $W_c$  are the widths of zones A\* and C\* that are defined by expressions:

$$W_a = x_a^+ - x_a^-, \quad W_c = x_c^+ - x_c^-. \quad (\text{S18})$$

By taking into account the following definitions for  $t_{\text{sep}}$  and  $t_{\text{eq}}$ :

$$t_{\text{sep}} = \frac{W}{|v_C - v_A|}, \quad t_{\text{eq}} = \frac{1}{Bk_+ + k_-}, \quad (\text{S19})$$

and by defining  $x_a^+$  and  $x_c^-$  so that the widths of zones A\* and C\*,  $W_a$  and  $W_c$ , respectively, would coincide with the initial plug width  $W$ :

$$W_a = W, \quad W_c = W, \quad (\text{S20})$$

we finally obtain ordinary differential equations for mass transfer:

$$\frac{dA_a^*}{dt} = -k_+BA_a^* + k_-C_a^*, \quad \frac{dC_a^*}{dt} = k_+BA_a^* - \left(k_- + \frac{3}{t_{\text{sep}}}\right)C_a^* \quad (\text{S21})$$

$$\frac{dA_c^*}{dt} = -\left(k_+B + \frac{3}{t_{\text{sep}}}\right)A_c^* + k_-C_c^*, \quad \frac{dC_c^*}{dt} = k_+BA_c^* - k_-C_c^* \quad (\text{S22})$$

Equations (S21) and (S22) are identical to equations (6) and (7) in the main text. They allow a significant simplification of the mathematical part of the developed parameter-based method for finding  $k_+$  and  $k_-$ . At the same time, this simplification results in only 10% relative errors in the rate constants as was shown by our detailed study (the results are shown in **Fig. 5** of the main text). This accuracy is acceptable for most kinetic studies of biomolecular interactions.

## 2. Solutions to ordinary differential equations for mass transfer in zones A\* and C\*

System of linear differential equations (S21) has a critical point located at the origin in the phase plane ( $A_a^*$ ,  $C_a^*$ ) (**Fig. S2**). Similarly, system of equations (S22) has a critical point located at the origin in the plane ( $A_c^*$ ,  $C_c^*$ ).

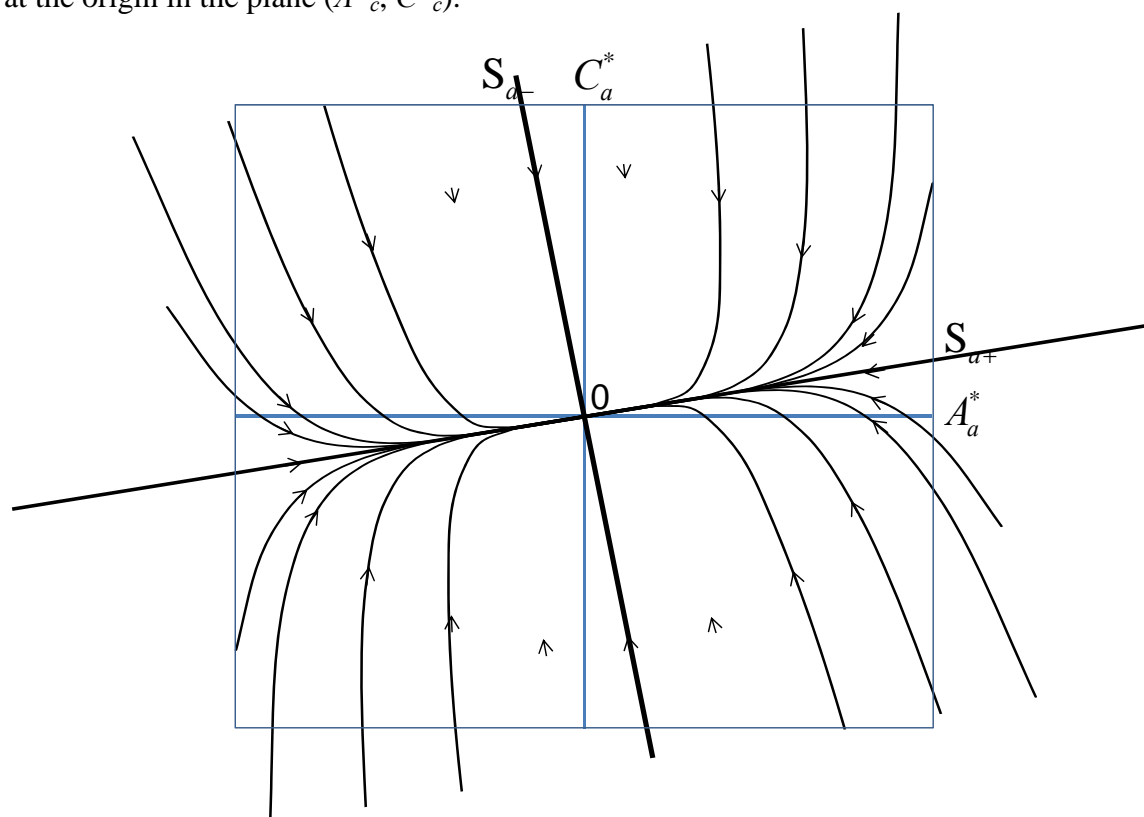

**Figure S2.** Qualitative phase portrait of system (S21). Its solutions are depicted by black lines in the plane ( $A_a^*$ ,  $C_a^*$ ). Arrows show directions in which time increases. The thick straight lines represent solutions that satisfy the first condition from (S27). Rays  $OS_{a+}$  and  $OS_{a-}$  intersect at a right angle if  $K_d = B$ . The ray  $OS_{a+}$  corresponds to the special solution (S34) and, therefore,  $\tan \angle A_a^*OS_{a+} = \eta_a$ . The phase portrait of system (S22) looks similar.

Let us denote eigenvalues of (S21) as  $-\lambda_{a\pm}$  and eigenvalues of (S22) as  $-\lambda_{c\pm}$ . These eigenvalues satisfy quadratic equations that follow from (S21) and (S22):

$$\lambda_{a\pm}^2 - \left( Bk_+ + k_- + \frac{3}{t_{\text{sep}}} \right) \lambda_{a\pm} + \frac{3Bk_+}{t_{\text{sep}}} = 0 \quad (\text{S23})$$

$$\lambda_{c\pm}^2 - \left( Bk_+ + k_- + \frac{3}{t_{\text{sep}}} \right) \lambda_{c\pm} + \frac{3k_-}{t_{\text{sep}}} = 0 \quad (\text{S24})$$

Roots of (S23) and (S24) are determined by expressions:

$$\lambda_{a\pm} = \frac{1}{2} \left( Bk_+ + k_- + \frac{3}{t_{\text{sep}}} \right) \pm \sqrt{\frac{1}{4} \left( Bk_+ + k_- + \frac{3}{t_{\text{sep}}} \right)^2 - \frac{3Bk_+}{t_{\text{sep}}}} \quad (\text{S25})$$

$$\lambda_{c\pm} = \frac{1}{2} \left( Bk_+ + k_- + \frac{3}{t_{\text{sep}}} \right) \pm \sqrt{\frac{1}{4} \left( Bk_+ + k_- + \frac{3}{t_{\text{sep}}} \right)^2 - \frac{3k_-}{t_{\text{sep}}}} \quad (\text{S26})$$

Here, plus and minus signs in subscripts (at  $\lambda_{a\pm}$  and  $\lambda_{c\pm}$ ) correspond, respectively, to plus and minus signs in front of the radicals. Obviously, both eigenvalues  $-\lambda_{a\pm}$  are real, distinct and negative. The same is true for eigenvalues  $-\lambda_{c\pm}$ . Therefore, both critical points are improper stable nodes.<sup>1,2</sup> All solutions to system (S21) approach the point  $A_a^* = 0$ ,  $C_a^* = 0$  and all solutions to system (S22) approach the point  $A_c^* = 0$ ,  $C_c^* = 0$  (**Fig. S2**). In physical terms, such a behavior means that peaks A\* and C\* gradually decrease and eventually disappear with increasing time. As a result of this relaxation process, all compounds A\* and C\* will be distributed over the “bridge”. It is well known that solutions to a system of two ordinary differential equations can approach an improper stable node with distinct eigenvalues only in two directions.<sup>1,2</sup> Therefore, we have at  $t \rightarrow \infty$ :

$$\frac{C_a^*(t)}{A_a^*(t)} = \eta_{a\pm} = \text{const}, \quad \frac{A_c^*(t)}{C_c^*(t)} = \eta_{c\pm} = \text{const}. \quad (\text{S27})$$

where the plus and minus signs in subscripts correspond to these different directions. Only non-negative values of  $\eta_{a\pm}$  and  $\eta_{c\pm}$  can describe physical processes since concentrations of A\* and C\* are non-negative quantities. This non-negativity condition for  $\eta_{a\pm}$  and  $\eta_{c\pm}$  fixes one possible direction in each node. Systems (S21) and (S22) have special solutions that satisfy (S27) at all  $t \geq 0$  rather than at  $t \rightarrow \infty$ . They correspond to straight lines in the phase planes  $(A_a^*, C_a^*)$  and  $(A_c^*, C_c^*)$  (**Fig. S2**). To find such solutions, we have to substitute  $C_a^*(t) = \eta_{a\pm} A_a^*(t)$  into system

(S21) and to substitute  $A_c^*(t) = \eta_{c\pm} C_c^*(t)$  into system (S22). As a result, the following quadratic equations for  $\eta_{a\pm}$  and  $\eta_{c\pm}$  can be obtained:

$$k_- \eta_{a\pm}^2 - \left( Bk_+ - k_- - \frac{3}{t_{\text{sep}}} \right) \eta_{a\pm} - Bk_+ = 0 \quad (\text{S28})$$

and

$$Bk_+ \eta_{c\pm}^2 - \left( k_- - Bk_+ - \frac{3}{t_{\text{sep}}} \right) \eta_{c\pm} - k_- = 0 \quad (\text{S29})$$

Roots of these equations are determined by expressions

$$\eta_{a\pm} = \frac{1}{k_-} \left\{ \frac{1}{2} \left( Bk_+ - k_- - \frac{3}{t_{\text{sep}}} \right) \pm \sqrt{\frac{1}{4} \left( Bk_+ - k_- - \frac{3}{t_{\text{sep}}} \right)^2 + Bk_+ k_-} \right\} \quad (\text{S30})$$

and

$$\eta_{c\pm} = \frac{1}{Bk_+} \left\{ \frac{1}{2} \left( k_- - Bk_+ - \frac{3}{t_{\text{sep}}} \right) \pm \sqrt{\frac{1}{4} \left( k_- - Bk_+ - \frac{3}{t_{\text{sep}}} \right)^2 + Bk_+ k_-} \right\} \quad (\text{S31})$$

The plus signs in front of the radicals obviously correspond to positive roots  $\eta_a \equiv \eta_{a+}$  and  $\eta_c \equiv \eta_{c+}$ . Expressions (S30) and (S31) for these roots can be rewritten as follows:

$$\eta_a = \frac{Bk_+ - \lambda_a}{k_-} \geq 0, \quad \eta_c = \frac{k_- - \lambda_c}{Bk_+} \geq 0, \quad (\text{S32})$$

where  $\lambda_a \equiv \lambda_{a-}$  and  $\lambda_c \equiv \lambda_{c-}$ . Given expression (S25) and (S26) for  $\lambda_{a-}$  and  $\lambda_{c-}$ , we also have:

$$\lambda_a = \Omega - \sqrt{\Omega^2 - \frac{3Bk_+}{t_{\text{sep}}}}, \quad \lambda_c = \Omega - \sqrt{\Omega^2 - \frac{3k_-}{t_{\text{sep}}}}, \quad \Omega \equiv \frac{1}{2} \left( Bk_+ + k_- + \frac{3}{t_{\text{sep}}} \right). \quad (\text{S33})$$

Finally, direct substitutions of expressions:

$$A_a^* = N_a \exp(-\lambda_a t), \quad C_a^* = \eta_a N_a \exp(-\lambda_a t), \quad (\text{S34})$$

and

$$A_c^* = \eta_c N_c \exp(-\lambda_c t), \quad C_c^* = N_c \exp(-\lambda_c t) \quad (\text{S35})$$

into equations (S21) and (S22), respectively, show that (S34) and (S35) are solutions to these equations. Here,  $N_a$  and  $N_c$  are constant coefficients that relate to initial amounts  $A_0^*$  and  $C_0^*$  of compounds A\* and C\* in the plug:

$$N_a + \eta_c N_c = A_0^*, \quad \eta_a N_a + N_c = C_0^*. \quad (\text{S36})$$

Obviously, solutions (S34) and (S35) also satisfy conditions (S27) with positive values of constants. These solutions are represented by the ray  $OS_{a+}$  in **Fig. S2** and by a similar ray (that should be denoted as  $OS_{c+}$ ) in the phase portrait of system (S22).

If  $t_{sep} \ll t_{eq}$ , we have from definitions (S33) for  $\Omega$  and (S19) for  $t_{sep}$  and  $t_{eq}$ :

$$\frac{3Bk_+}{t_{sep}\Omega^2} = \frac{12Bk_+}{t_{sep}\left(Bk_+ + k_- + \frac{3}{t_{sep}}\right)^2} < \frac{12t_{sep}}{t_{eq}\left(\frac{t_{sep}}{t_{eq}} + 3\right)^2} < \frac{4t_{sep}}{3t_{eq}} \ll 1 \quad (S37)$$

$$\frac{3k_-}{t_{sep}\Omega^2} = \frac{12Bk_-}{t_{sep}\left(Bk_+ + k_- + \frac{3}{t_{sep}}\right)^2} < \frac{12t_{sep}}{t_{eq}\left(\frac{t_{sep}}{t_{eq}} + 3\right)^2} < \frac{4t_{sep}}{3t_{eq}} \ll 1 \quad (S38)$$

In this case, expressions (S33) can be expanded in small parameter  $t_{sep}/t_{eq}$ . As a result, we obtain the following asymptotic relations (to the first order in  $t_{sep}/t_{eq}$ ):

$$\lambda_a = \Omega - \Omega \sqrt{1 - \frac{3Bk_+}{t_{sep}\Omega^2}} \approx \Omega - \Omega \left(1 - \frac{3Bk_+}{2t_{sep}\Omega^2}\right) = \frac{3Bk_+}{2t_{sep}\Omega} = Bk_+ \left(1 + \frac{t_{sep}}{3t_{eq}}\right)^{-1} \approx Bk_+ \left(1 - \frac{t_{sep}}{3t_{eq}}\right) \quad (S39)$$

$$\lambda_c = \Omega - \Omega \sqrt{1 - \frac{3k_-}{t_{sep}\Omega^2}} \approx \Omega - \Omega \left(1 - \frac{3k_-}{2t_{sep}\Omega^2}\right) = \frac{3k_-}{2t_{sep}\Omega} = k_- \left(1 + \frac{t_{sep}}{3t_{eq}}\right)^{-1} \approx k_- \left(1 - \frac{t_{sep}}{3t_{eq}}\right). \quad (S40)$$

Therefore,  $\lambda_a$  and  $\lambda_c$  approach  $Bk_+$  and  $k_-$ , respectively, if the ratio  $t_{sep}/t_{eq}$  approaches zero. At small values of  $t_{sep}/t_{eq}$  we obtain:

$$\lambda_a \approx Bk_+, \quad \lambda_c \approx k_- \quad (t_{sep}/t_{eq} \ll 1), \quad (S41)$$

Relations (S32) – (S35) and (S41) are identical to relations (8) – (14) in the main text.

Given (S25) and (S26), the following inequalities are fulfilled for the absolute values of eigenvalues:

$$\frac{\lambda_{a+}}{\lambda_{a-}} > 1, \quad \frac{\lambda_{c+}}{\lambda_{c-}} > 1. \quad (S42)$$

Therefore, using a general theory of dynamic systems,<sup>1,2</sup> we can conclude that all (but two) solutions to system (S21) approach the critical point of (S21) in the same direction as the special solution (S34) (**Fig. S2**). Similarly, all (but two) solutions to system (S22) approach the critical point of (S22) in the same direction as the special solution (S35). Thus, solutions (S34) and (S35) are stable. Actually, the ratios (S37) are significantly larger than unity (for example, they are more than 5.83 at  $K_d = B$ ). Because of this fact, the convergence of other solutions to the special solutions (S34) and (S35) occurs relatively quickly (**Fig. S2**). As a result, special solutions can be considered good candidates to describe processes of relaxation of peaks  $A^*$  and  $C^*$ . One could expect that they describe the relaxation that occurs at the maximum speed and, therefore, takes place in reality.

### 3. Determination of the rate constants $k_+$ and $k_-$ based on the total amounts of the mixture of $A^*$ and $C^*$ in zones $A^*$ and $C^*$



Taking into account (S34) and (S35), we have:

$$L_a(t_{a1}) \equiv A_a^* + C_a^* = (1 + \eta_a) N_a \exp(-\lambda_a t_{a1}), \quad L_c(t_{c1}) \equiv A_c^* + C_c^* = (1 + \eta_c) N_c \exp(-\lambda_c t_{c1}), \quad (\text{S43})$$

$$L_a(t_{a2}) \equiv A_a^* + C_a^* = (1 + \eta_a) N_a \exp(-\lambda_a t_{a2}), \quad L_c(t_{c2}) \equiv A_c^* + C_c^* = (1 + \eta_c) N_c \exp(-\lambda_c t_{c2}). \quad (\text{S44})$$

Here  $L_a$  and  $L_c$  are the total amounts of the label (or the mixture of A\* and C\*) in zones A\* and C\*, respectively;  $t_{a1}$  and  $t_{a2}$  are two different times at which  $L_a$  is measured; similarly,  $t_{c1}$  and  $t_{c2}$  are two (other) different times at which  $L_c$  is measured. It is obvious from relations (S43) and (S44) that:

$$\frac{L_a(t_{a1})}{L_a(t_{a2})} = \exp[\lambda_a(t_{a2} - t_{a1})], \quad \frac{L_c(t_{c1})}{L_c(t_{c2})} = \exp[\lambda_c(t_{c2} - t_{c1})]. \quad (\text{S45})$$

By solving (S45) with respect to  $\lambda_a$  and  $\lambda_c$ , we obtain the following expressions for them in terms of the measurable quantities ( $L_a$ ,  $L_c$ ,  $t_{a1}$ ,  $t_{a2}$ ,  $t_{c1}$ ,  $t_{c2}$ ):

$$\lambda_a = \frac{1}{t_{a2} - t_{a1}} \ln \frac{L_a(t_{a1})}{L_a(t_{a2})}, \quad \lambda_c = \frac{1}{t_{c2} - t_{c1}} \ln \frac{L_c(t_{c1})}{L_c(t_{c2})}. \quad (\text{S46})$$

They coincide with relations (17) from the main text. On the other hand,  $\lambda_a$  and  $\lambda_c$  can be expressed in terms of rate constants,  $k_+$  and  $k_-$ , using (S33). Remarkably, to determine  $k_+$  and  $k_-$ , we actually do not need to solve algebraic equations (S33) containing radicals. The rate constants can be easily expressed in terms of  $\lambda_a$  and  $\lambda_c$ , using relations (S23) and (S24). The latter form a system of linear algebraic equations with respect to  $k_+$  and  $k_-$ . By adding up (S23) and (S24), we obtain an equation that can be readily solved with respect to  $Bk_+ + k_- \equiv 1/t_{\text{eq}}$ . As a result,

$$\frac{1}{t_{\text{eq}}} \equiv Bk_+ + k_- = \frac{3(\lambda_a + \lambda_c) - t_{\text{sep}}(\lambda_a^2 + \lambda_c^2)}{3 - t_{\text{sep}}(\lambda_a + \lambda_c)}. \quad (\text{S47})$$

Then, by solving (S23) and (S24) with respect to  $Bk_+$  and  $k_-$ , we finally obtain:

$$Bk_+ = \left(1 + \frac{t_{\text{sep}}}{3t_{\text{eq}}}\right) \lambda_a - t_{\text{sep}} \lambda_a^2, \quad k_- = \left(1 + \frac{t_{\text{sep}}}{3t_{\text{eq}}}\right) \lambda_c - t_{\text{sep}} \lambda_c^2. \quad (\text{S48})$$

Here,  $1/t_{\text{eq}}$  is presumed to be expressed in terms of  $\lambda_a$  and  $\lambda_c$ , using (S47). Solutions (S47) and (S48) coincide with relations (18) – (20) in the main text. It is obvious from (S46) – (S48) that the rate constants are completely determined by  $L_a(t_{a1})/L_a(t_{a2})$  and  $L_c(t_{c1})/L_c(t_{c2})$ , i.e. by the ratios of the amounts of the label (or the mixture of A\* and C\*) measured at two different times in zones A\* and C\*. Total amounts  $L_a$  and  $L_c$  in (S46) can be replaced by total signals  $L_{fa}$  and

$L_{fc}$  from zones A\* and C\*, respectively, as it is explained in the main text. Then ratios  $L_{fa}(t_{a1})/L_{fa}(t_{a2})$  and  $L_{fc}(t_{c1})/L_{fc}(t_{c2})$  can be calculated using the areas of corresponding zones in spatial or temporal propagation patterns of the label (or the mixture of A\* and C\*) (**Fig. S1**), given the following relations between these areas:

$$\int_{x_a^-}^{x_a^+} L_{fa}(x, t_{a1}) dx = v_A \int_{t_a^+}^{t_a^-} L_{fa}(x_1, t) dt, \quad \int_{x_c^-}^{x_c^+} L_{fc}(x, t_{c1}) dx = v_C \int_{t_c^+}^{t_c^-} L_{fc}(x_1, t) dt, \quad (\text{S49})$$

$$\int_{x_a^-}^{x_a^+} L_{fa}(x, t_{a2}) dx = v_A \int_{t_a^+}^{t_a^-} L_{fa}(x_2, t) dt, \quad \int_{x_c^-}^{x_c^+} L_{fc}(x, t_{c2}) dx = v_C \int_{t_c^+}^{t_c^-} L_{fc}(x_2, t) dt \quad (\text{S50})$$

Here,  $t_a^+$  and  $t_a^-$  are moments of time in the temporal propagation pattern of zone A\* corresponding to the boundaries  $x_a^+$  and  $x_a^-$  in its spatial propagation pattern. Similarly,  $t_c^+$  and  $t_c^-$  are moments of time in the temporal propagation pattern of zone C\* corresponding to the boundaries  $x_c^+$  and  $x_c^-$  in its spatial propagation pattern. Obviously,  $t_a^+ < t_a^-$  and  $t_c^+ < t_c^-$  since right boundaries  $x_a^+$  and  $x_c^+$  reach the detector earlier than corresponding left boundaries  $x_a^-$  and  $x_c^-$ . The above considerations are based on definitions of the right and left boundaries ( $x_a^+$  and  $x_c^-$ ) for zones A\* and C\*, respectively, that lead to relations (S20). These “inner” boundaries of zones A\* and C\* could be defined in some other way, for example, as coordinates of the local minimums in the concentration of the label (or the mixture of A\* and C\*) (**Fig. S1**). These minimums can be found at the flanks of the “bridge” connecting zones A\* and C\*. Let us assume that widths  $W_a$  and  $W_c$  of such redefined zones A\* and C\* remain approximately constant with time but differ significantly from  $W$ . Then, the above results will remain valid after the following modification. If  $W_a \approx W_c$  one should just use  $W_a$  or  $W_c$  (instead of  $W$ ) in definition (S19) for  $t_{\text{sep}}$ . In more general case, when  $W_a$  and  $W_c$  vary considerably, different separation times:

$$t_a = \frac{W_a}{|v_C - v_A|}, \quad t_c = \frac{W_c}{|v_C - v_A|} \quad (\text{S51})$$

should be used in zones A\* and C\*, respectively. Thus, all above results related to zone A\* will hold true if  $t_{\text{sep}}$  is replaced with  $t_a$  in the corresponding equations. Similarly, results related to zone C\* will hold true if  $t_{\text{sep}}$  is replaced with  $t_c$ . However, expressions (S47) and (S48) for the rate constants cannot be modified in such a way. Indeed, to derive (S47) and (S48), we used the fact that both (S23) and (S24) contain the same parameter  $t_{\text{sep}}$ . It should be replaced with  $t_a$  (in equation (S23) or with  $t_c$  (in equation (S24)), if the widths  $W_a$  and  $W_c$  of zones A\* and C\* are different. After such a modification of equations (S23) and (S24), their solutions cannot be found by the simple way described. Instead, one should apply Cramer’s rule.<sup>3</sup> As a result, expressions for  $Bk_+$  and  $k_-$  become more cumbersome. Moreover, this procedure requires complex processing of experimental data to identify boundaries of zones A\* and C\*.

## References

- 1 Hirsch, M. W.; Smale, S. ; Devaney, R. *Differential Equations, Dynamical Systems, and an Introduction to Chaos* (2nd ed.); Academic Press, 2003 (425 pages).
- 2 Jordan, D. W.; Smith, P. *Nonlinear Ordinary Differential Equations* (4th ed.); Oxford University Press, 2007 (540 pages).
- 3 Leon, S. J. *Linear Algebra with Applications* (7th ed.), Pearson Prentice Hall, 2006 (544 pages).
